# Supplementary material
Source: HighWire-hosted journal article supplement (https://bmjopenquality.bmj.com/highwire/filestream/136154/field_highwire_adjunct_files/0/ds6601.docx)
Supplement: ds6601.docx [file ds6601.docx]

Table 2.

| Assessment criteria | Number of notes compliant between preoperative assessment clinic and anaesthetic assessment (/50) | | | |  |
| --- | --- | --- | --- | --- | --- |
| Before improvement project | PDSA 1 | PDSA 2 | PDSA 3 | Percentage change after improvement project |
| History | 34 | 42 | 49 | 48 | +141% |
| Examination | 38 | 47 | 42 | 47 | +123% |
| Investigations | 16 | 22 | 19 | 44 | +275% |
| Fit for surgery | 50 | 49 | 50 | 50 | = |
